# Supplementary material for: Aluminum chloride-based catholytes for stable high-voltage solid-state sodium batteries
Source: Royal Society of Chemistry journal article supplement (doi:10.1039/d5ta08632a), 2025-12-29
Supplement: d5ta08632a1.pdf [file d5ta08632a1.pdf]

**Supporting Information for:**

# Aluminum chloride-based Catholytes for Stable High-voltage Solid-state Sodium Batteries

*Erick Ruoff and Arumugam Manthiram\**

Materials Science and Engineering Program & Walker Department of Mechanical Engineering,  
The University of Texas at Austin, Austin, TX 78712, USA

\*Corresponding Author. Tel: +1-512-471-1791; fax: +1-512-471-7681.  
E-mail address: manth@austin.utexas.edu (A. Manthiram)

## List of Supporting Figures

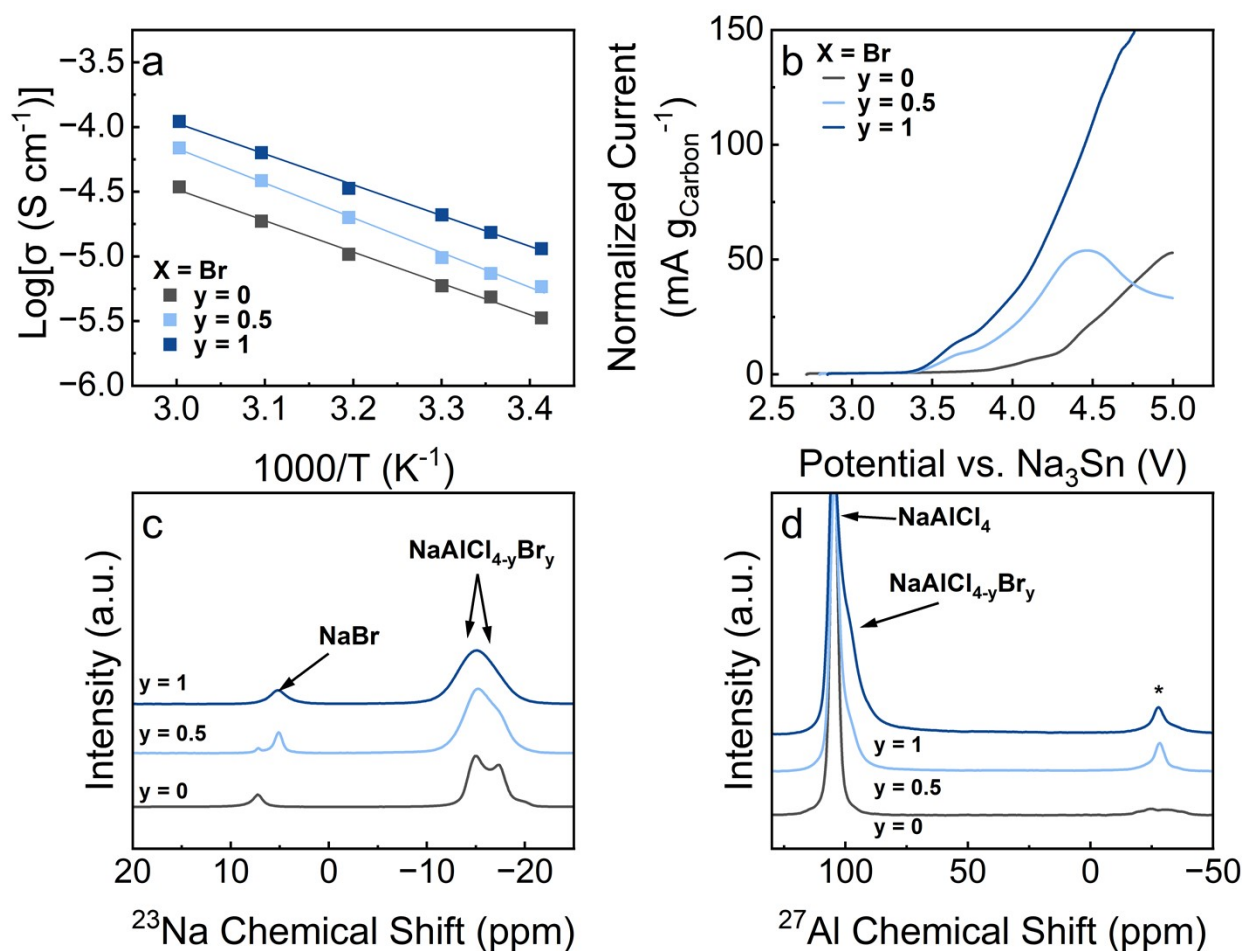

**Figure S1.** Characterization of  $[(1-y)\text{NaCl} + y\text{NaX} + \text{AlCl}_3]$  SE series for  $X = \text{Br}$ . (a) Arrhenius plots of ionic conductivity. (b) LSV curves. (c)  $^{23}\text{Na}$  and (d)  $^{27}\text{Al}$  solid-state magic angle spinning NMR spectra, “\*” signs indicate spinning side bands.

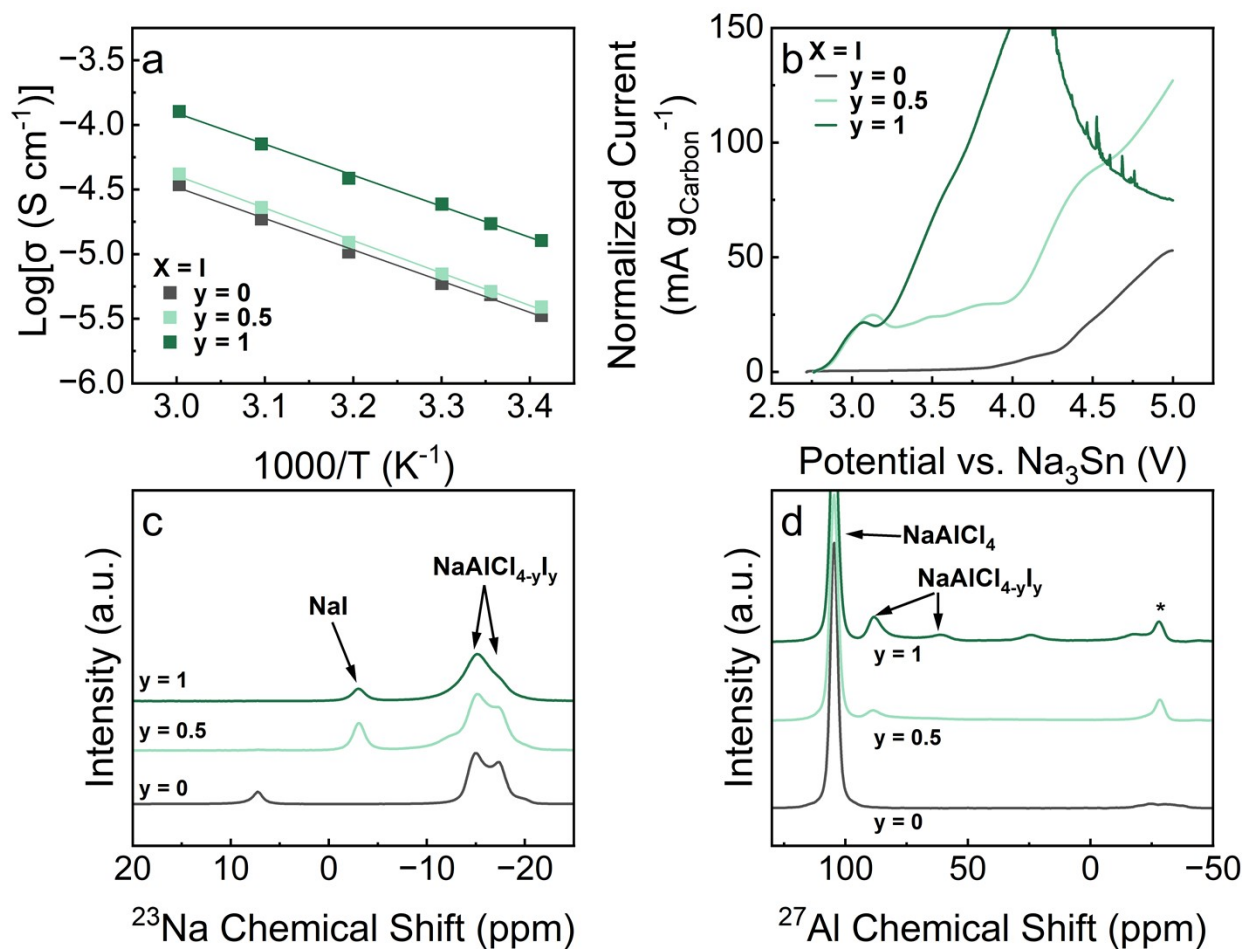

**Figure S2.** Characterization of  $[(1-y)\text{NaCl} + y\text{NaX} + \text{AlCl}_3]$  SE series for  $X = \text{I}$ . (a) Arrhenius plots of ionic conductivity. (b) LSV curves. (c)  $^{23}\text{Na}$  and (d)  $^{27}\text{Al}$  solid-state magic angle spinning NMR spectra, “\*” signs indicate spinning side bands.

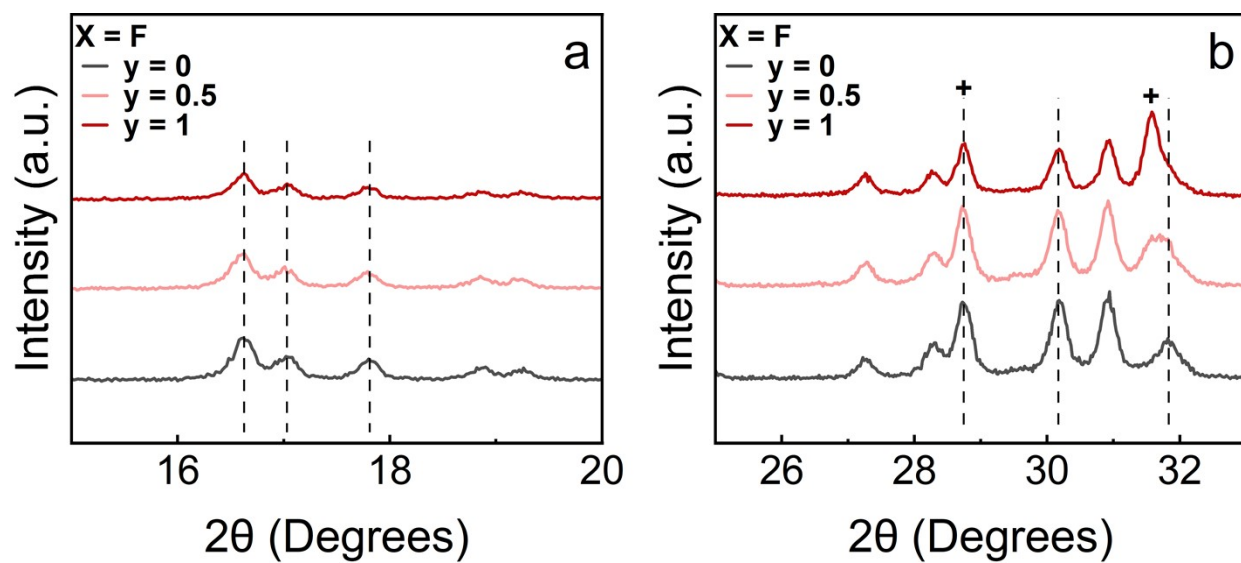

**Figure S3.** XRD patterns of the  $[(1-y)\text{NaCl} + y\text{NaX} + \text{AlCl}_3]$  SE series for  $X = \text{F}$ , zoomed in on ranges from (a) 15-20° and (b) 25-33°, with the + sign referring to reflections from NaCl.

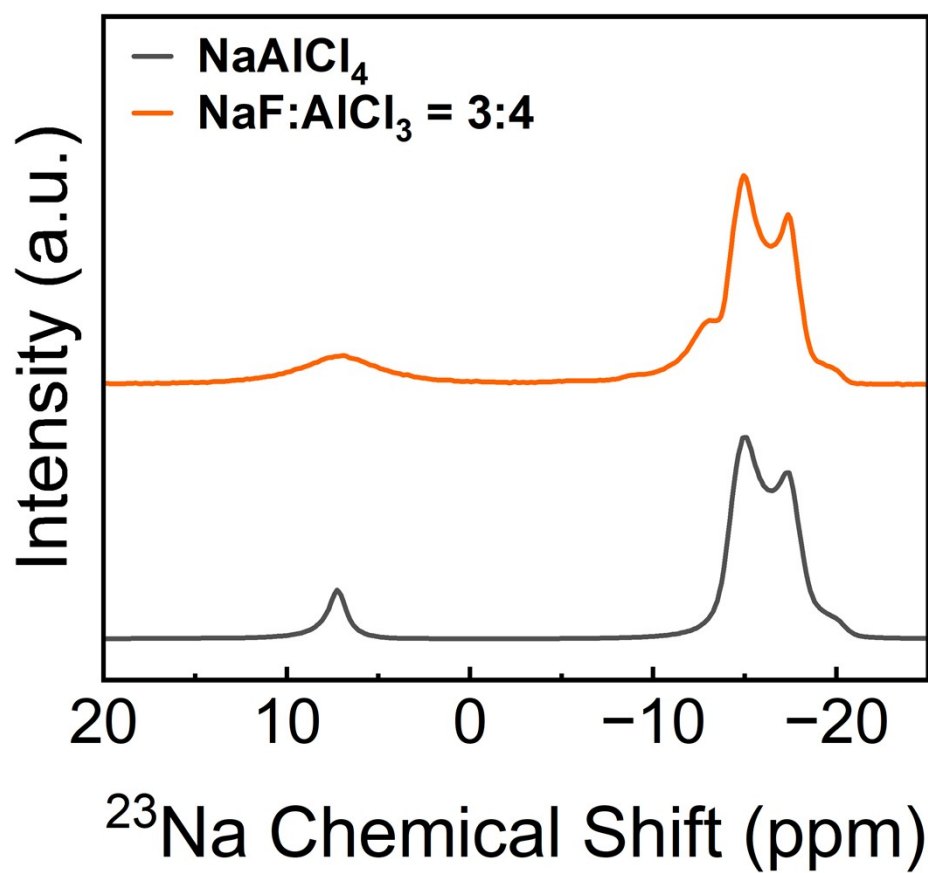

**Figure S4.**  $^{23}\text{Na}$  solid-state magic angle spinning NMR spectra of  $\text{NaF} : \text{AlCl}_3 = 3 : 4$  SE.

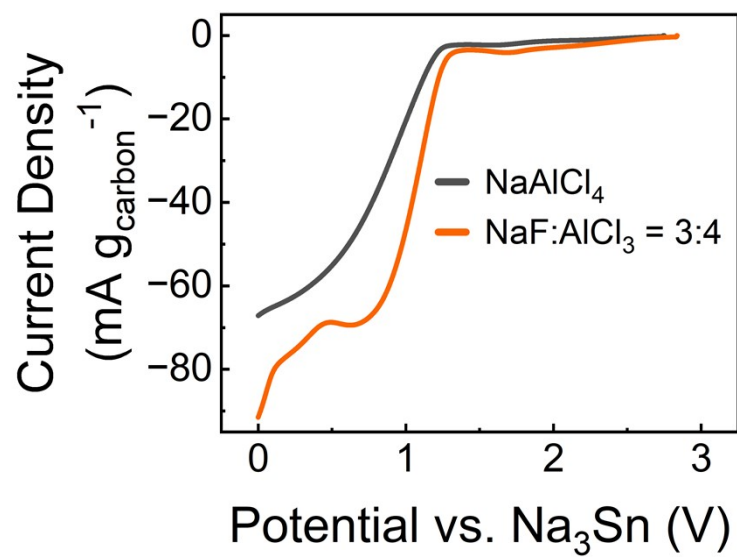

**Figure S5.** LSV curves of selected SE samples at a scan rate of 0.1 mv s<sup>-1</sup>.

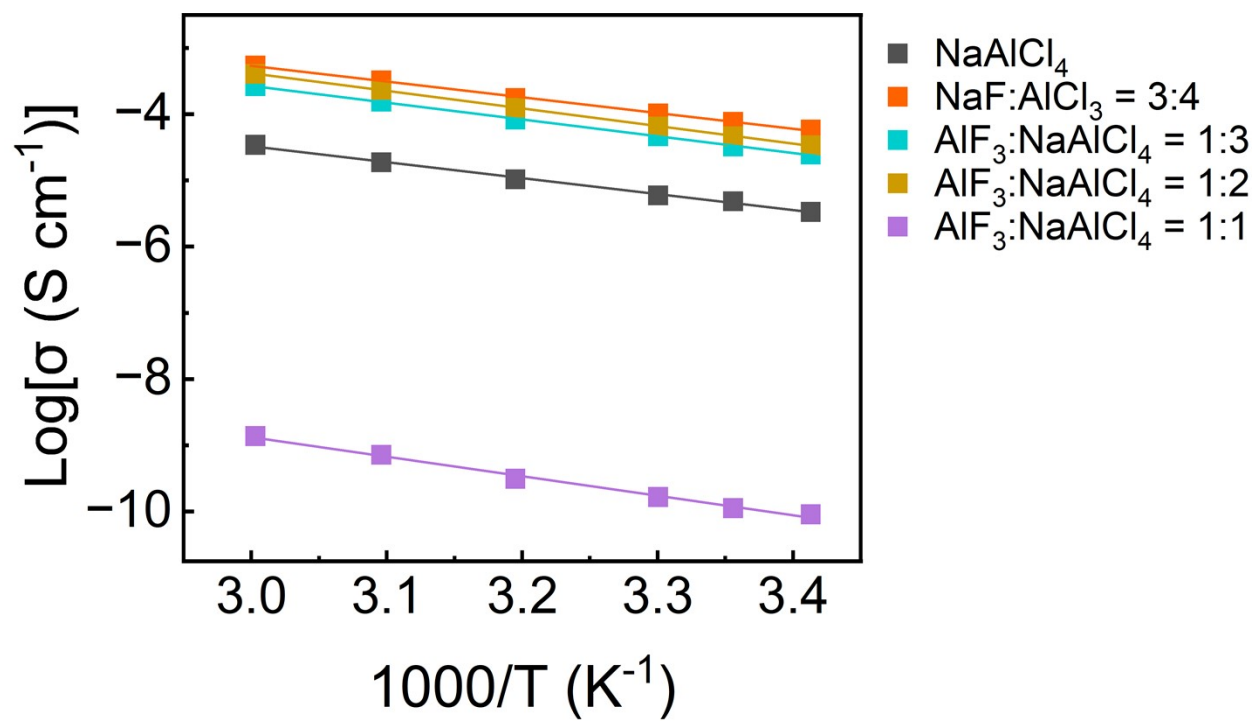

**Figure S6.** Arrhenius plots of ionic conductivity of various  $\text{AlF}_3 : \text{NaAlCl}_4$  composite SEs.

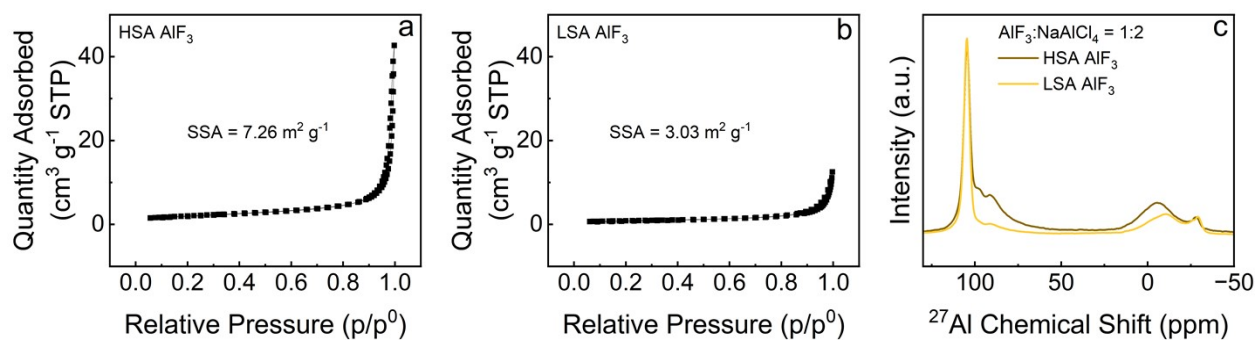

**Figure S7.** BET isotherms for (a) HSA  $\text{AlF}_3$  and (b) LSA  $\text{AlF}_3$ . (c)  $^{27}\text{Al}$  NMR spectra of  $\text{AlF}_3$  :  $\text{NaAlCl}_4$  = 1 : 2 composite SEs with HSA and LSA  $\text{AlF}_3$  prepared by a melt reaction method.



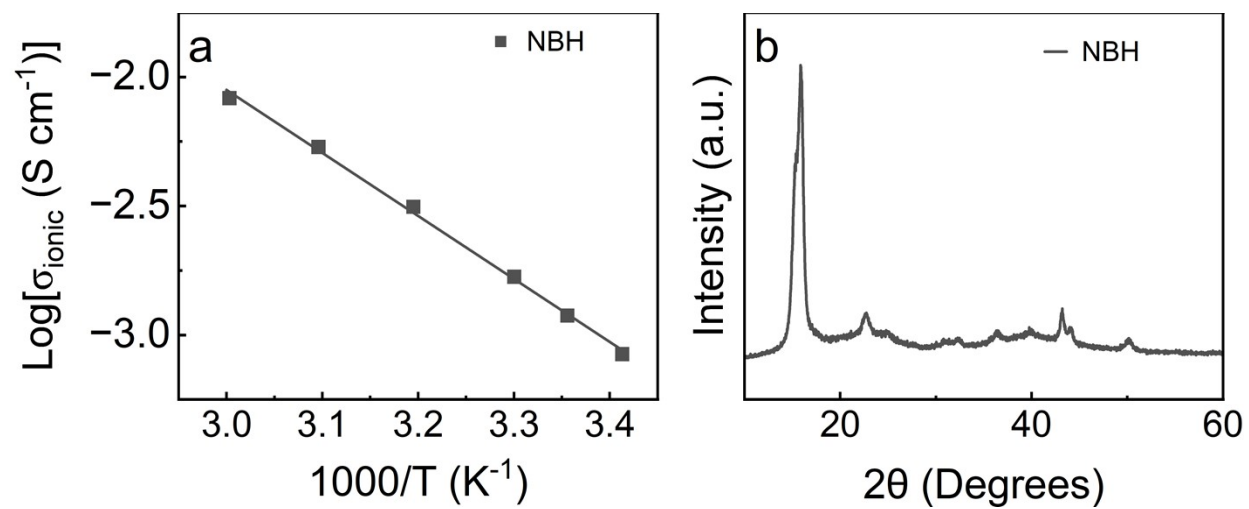

**Figure S8.** Arrhenius plot of ionic conductivity and XRD pattern of NBH SE.

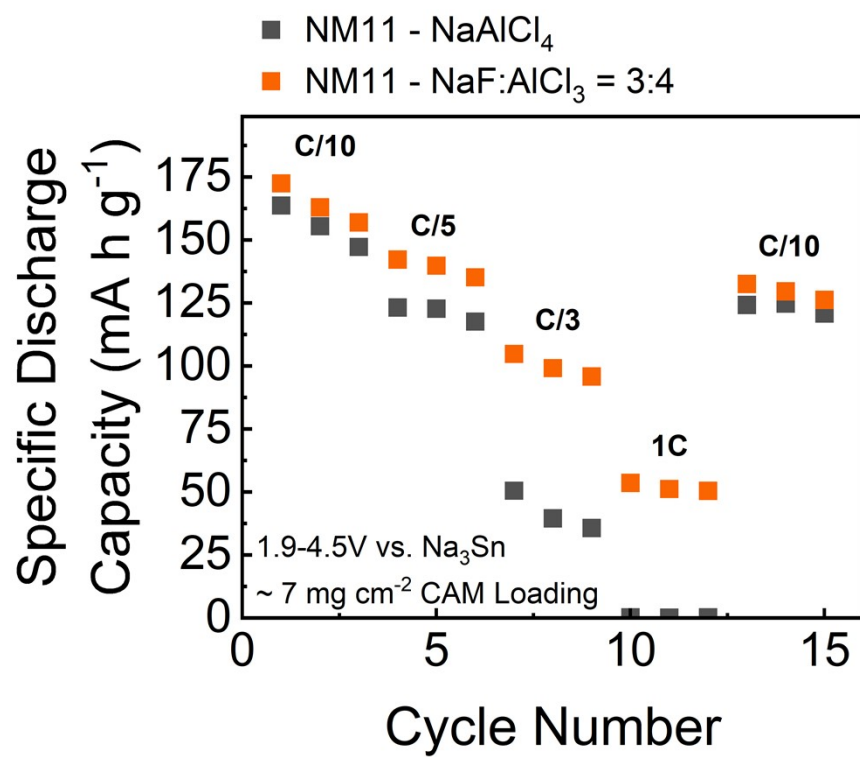

**Figure S9.** Rate capability testing of selected ASSBs.

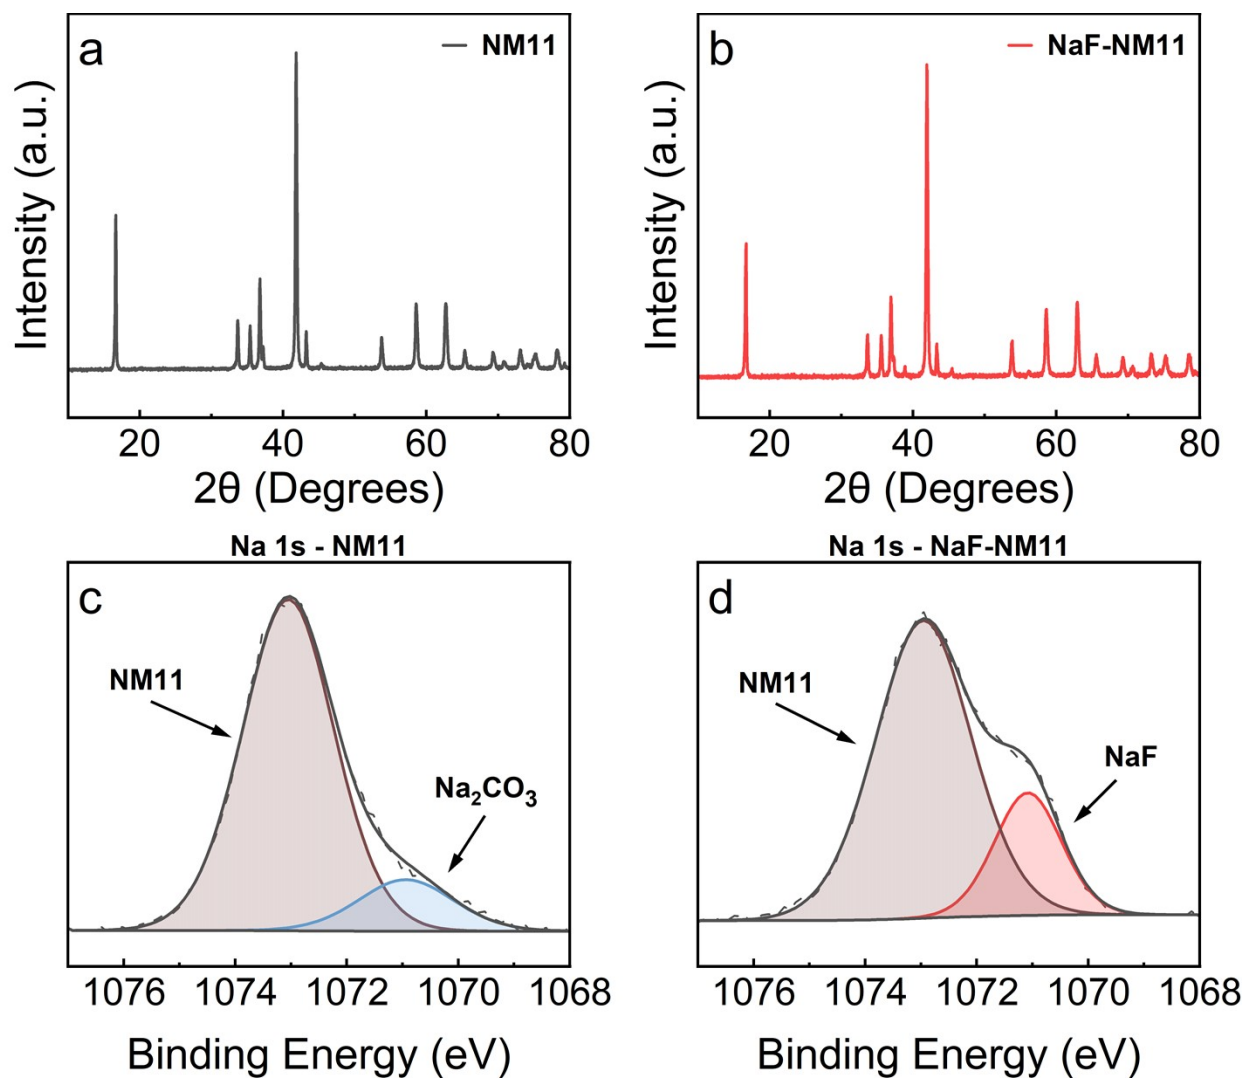

**Figure S10.** XRD pattern of (a) pristine and (b) NaF coated NM11 CAM. Na 1s XPS spectrum of (c) pristine and (d) NaF coated NM11 CAM.

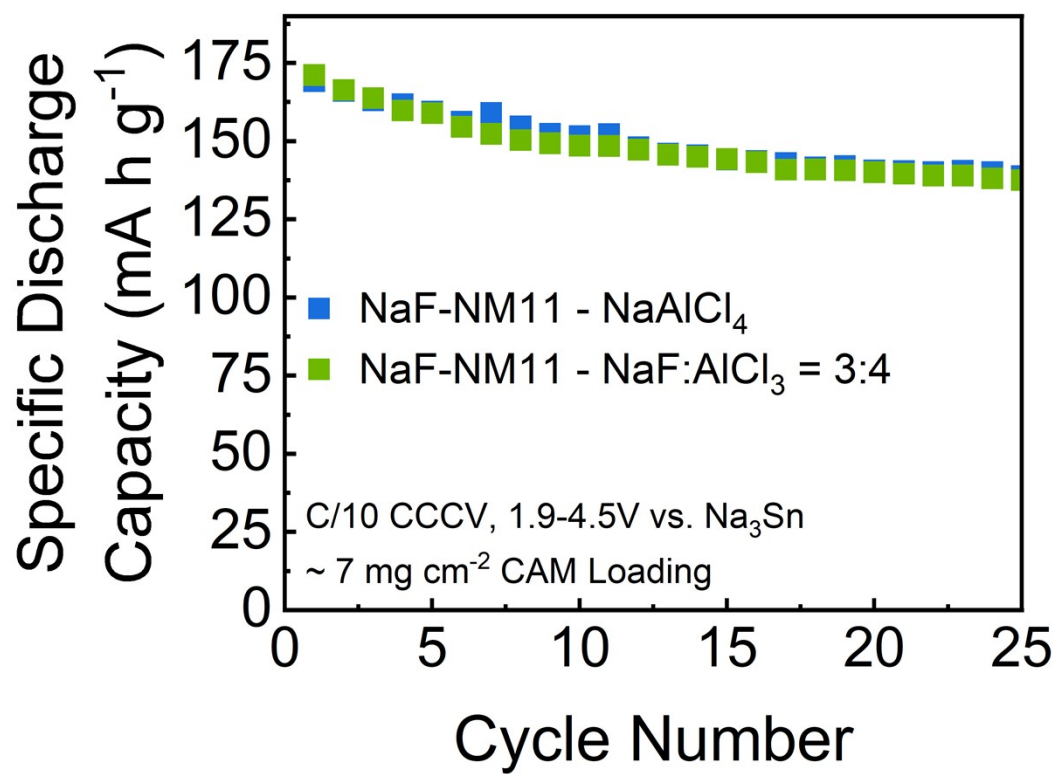

**Figure S11.** Initial ASSB cycling performance with NaF coated NM11 CAM.

## List of Supporting Tables

**Table S1.** Predicted reaction pathways and formation energies for the  $\text{AlCl}_3 + \text{NaF}$  reactants. Calculated from The Materials Project Interface Reactions application.<sup>1</sup>

| Reaction                                                                                    | $E_{\text{rxn}}$ (kJ mol <sup>-1</sup> ) |
|---------------------------------------------------------------------------------------------|------------------------------------------|
| $0.25 \text{ AlCl}_3 + 0.75 \text{ NaF} \rightarrow 0.75 \text{ NaCl} + 0.25 \text{ AlF}_3$ | -63.8                                    |
| $0.2 \text{ AlCl}_3 + 0.8 \text{ NaF} \rightarrow 0.2 \text{ NaAlF}_4 + 0.6 \text{ NaCl}$   | -57.4                                    |

## REFERENCES

- (1) Jain, A.; Ong, S. P.; Hautier, G.; Chen, W.; Richards, W. D.; Dacek, S.; Cholia, S.; Gunter, D.; Skinner, D.; Ceder, G.; Persson, K. A. Commentary: The Materials Project: A Materials Genome Approach to Accelerating Materials Innovation. *APL Mater* 2013, *1* (1), 011002. <https://doi.org/10.1063/1.4812323>.
